# Supplementary material for: Bioaccessibility of essential lipophilic nutrients in a chloroplast-rich fraction (CRF) from agricultural green waste during simulated human gastrointestinal tract digestion
Source: Royal Society of Chemistry journal article supplement (doi:10.1039/d2fo00604a), 2022-01-01
Supplement: d2fo00604a1.pdf [file d2fo00604a1.pdf]

1

## Supplementary material

### 2 **Bioaccessibility of essential lipophilic nutrients in a chloroplast-rich fraction (CRF)** 3 **from agriculture green waste during simulated human gastrointestinal tract digestion**

4 Jutarat Wattanakul<sup>a,b</sup> (jutarat.w@mail.rmutk.ac.th), Mansor Syamila<sup>a,c</sup>  
5 (syamila.mansor@usim.edu.my), Randa Darwish<sup>a</sup> (randa.darwish@nottingham.ac.uk),  
6 Mohamed A. Gedi<sup>a</sup> (mohageedi@gmail.com), Poramat Sucharit<sup>a</sup>  
7 (poramat.sucharit@nottingham.ac.uk), Chao chi<sup>a</sup> (chao.chi@nottingham.ac.uk), Patchaniya  
8 Akepach<sup>a,d</sup> (patchaniya.ake@sru.ac.th), Moulay Sahaka<sup>e</sup> (sahakamoulay@gmail.com),  
9 Brigitte Gontero<sup>e</sup> (bmeunier@imm.cnrs.fr), Frédéric Carrière<sup>e</sup> (carriere@imm.cnrs.fr), David A.  
10 Gray<sup>a\*</sup> (david.gray@nottingham.ac.uk)

11 <sup>a</sup> Division of Food, Nutrition and Dietetics, School of Biosciences, University of Nottingham, Sutton  
12 Bonington Campus, Loughborough, Leicestershire, LE12 5RD, United Kingdom.

13 <sup>b</sup> Department of Food Science and Technology, Faculty of Home Economics Technology, Rajamangala  
14 University of Technology Krungthep, Bangkok, 10120, Thailand.

15 <sup>c</sup> Universiti Sains Islam Malaysia, Bandar Baru Nilai, 78100 Nilai, Negeri Sembilan, Malaysia.

16 <sup>d</sup> Department of Food Innovation and Nutrition, Faculty of Science and Technology, Suratthani Rajabhat  
17 University, Surat Thani, 84100, Thailand.

18 <sup>e</sup> Aix Marseille Univ, CNRS, UMR7281 Bioénergétique et Ingénierie des Protéines, 31 Chemin Joseph  
19 Aiguier, 13402 Marseille, Cedex 09, France.

20 Corresponding author's telephone: +44(0) 115 951 6147

21

22

23

24

25 \* Corresponding author

26  
27  
28  
29  
30  
31  
32  
33  
34  
35  
36  
37  
38  
39  
40  
41  
42  
43  
44  
45  
46  
47  
48

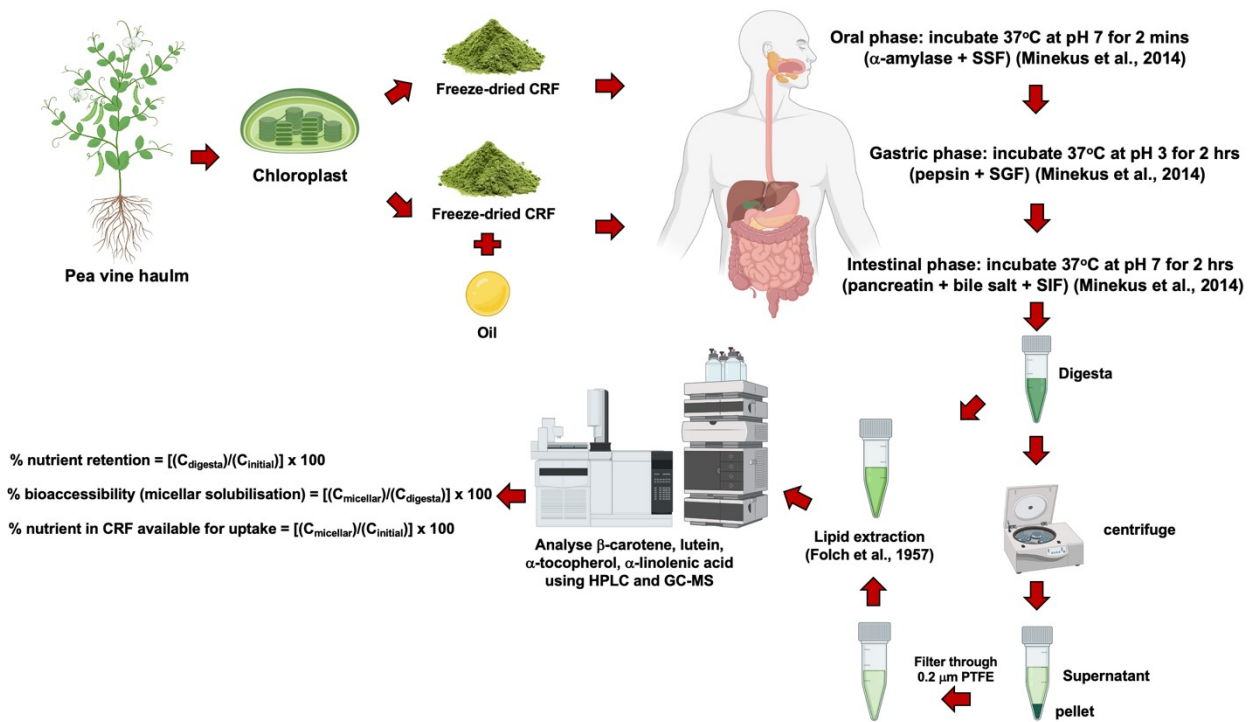

**Supplementary Figure 1:** Flow chart of the study of bioaccessibility of essential lipophilic nutrients.

49 **Supplementary Table 1:** % Peroxidase reduction of each treatment of pea vine juice (HPVH: Heated  
50 PVH before juicing and HJ: heated PVH juice)

| <b>Treatment</b> | <b>% Peroxidase reduction</b> |
|------------------|-------------------------------|
| HPVH             | 66.5%                         |
| HJ               | 100%                          |

51

52

53

54

55

56

57

58

59

60

61

62

63

64

65

66

67

68

Oral

Gastric

Intestine (complete digesta)

69

70

71

FJ

72

73

74

HPVH

75

76

77

78

HJ

79

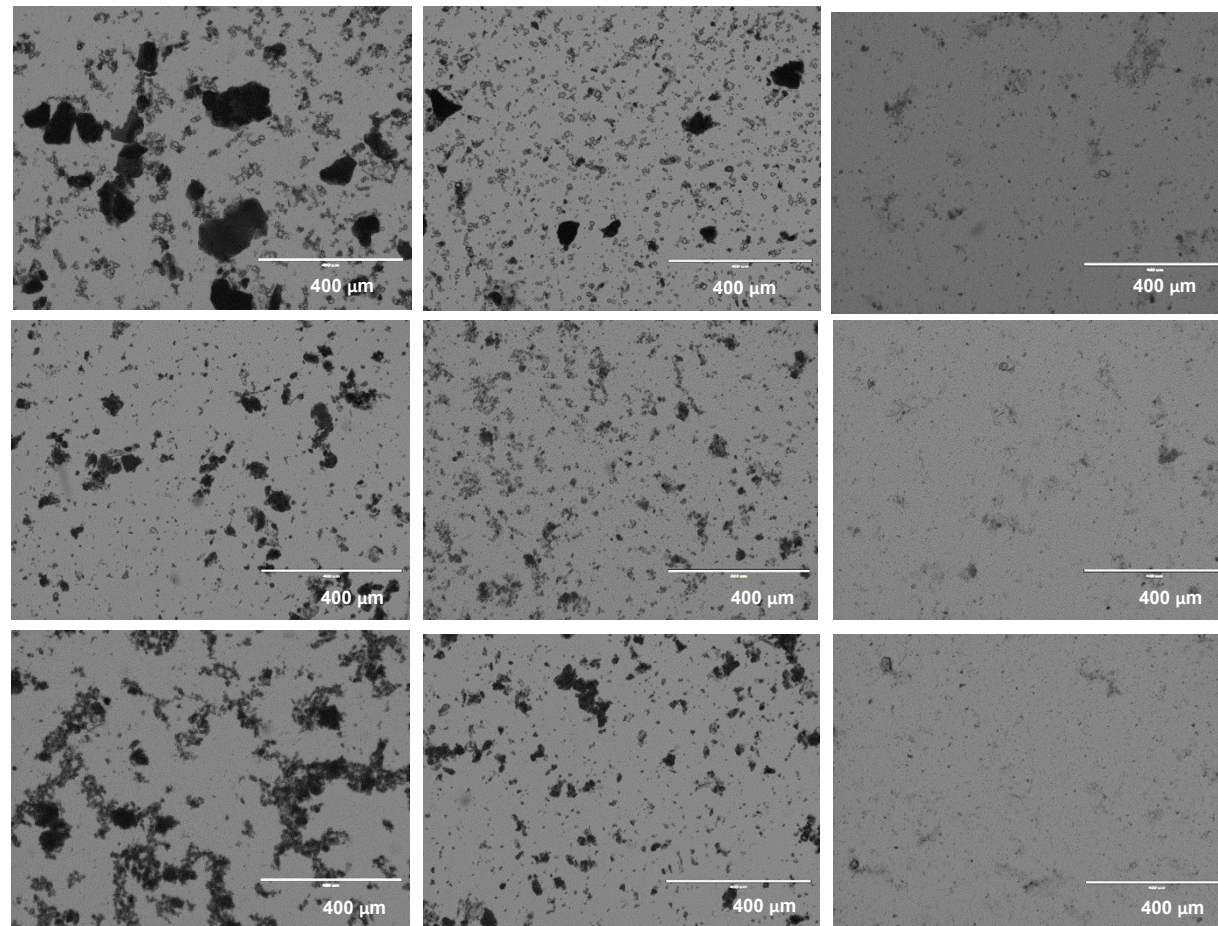

**Supplementary Figure 2:** Light Microscope images of CRF with different treatments, including fresh PVH juice (FJ), heated PVH (HPVH) and heated juice (HJ) at different stages: oral (2 min), gastric (2 hr), and intestine (2 hr).

80

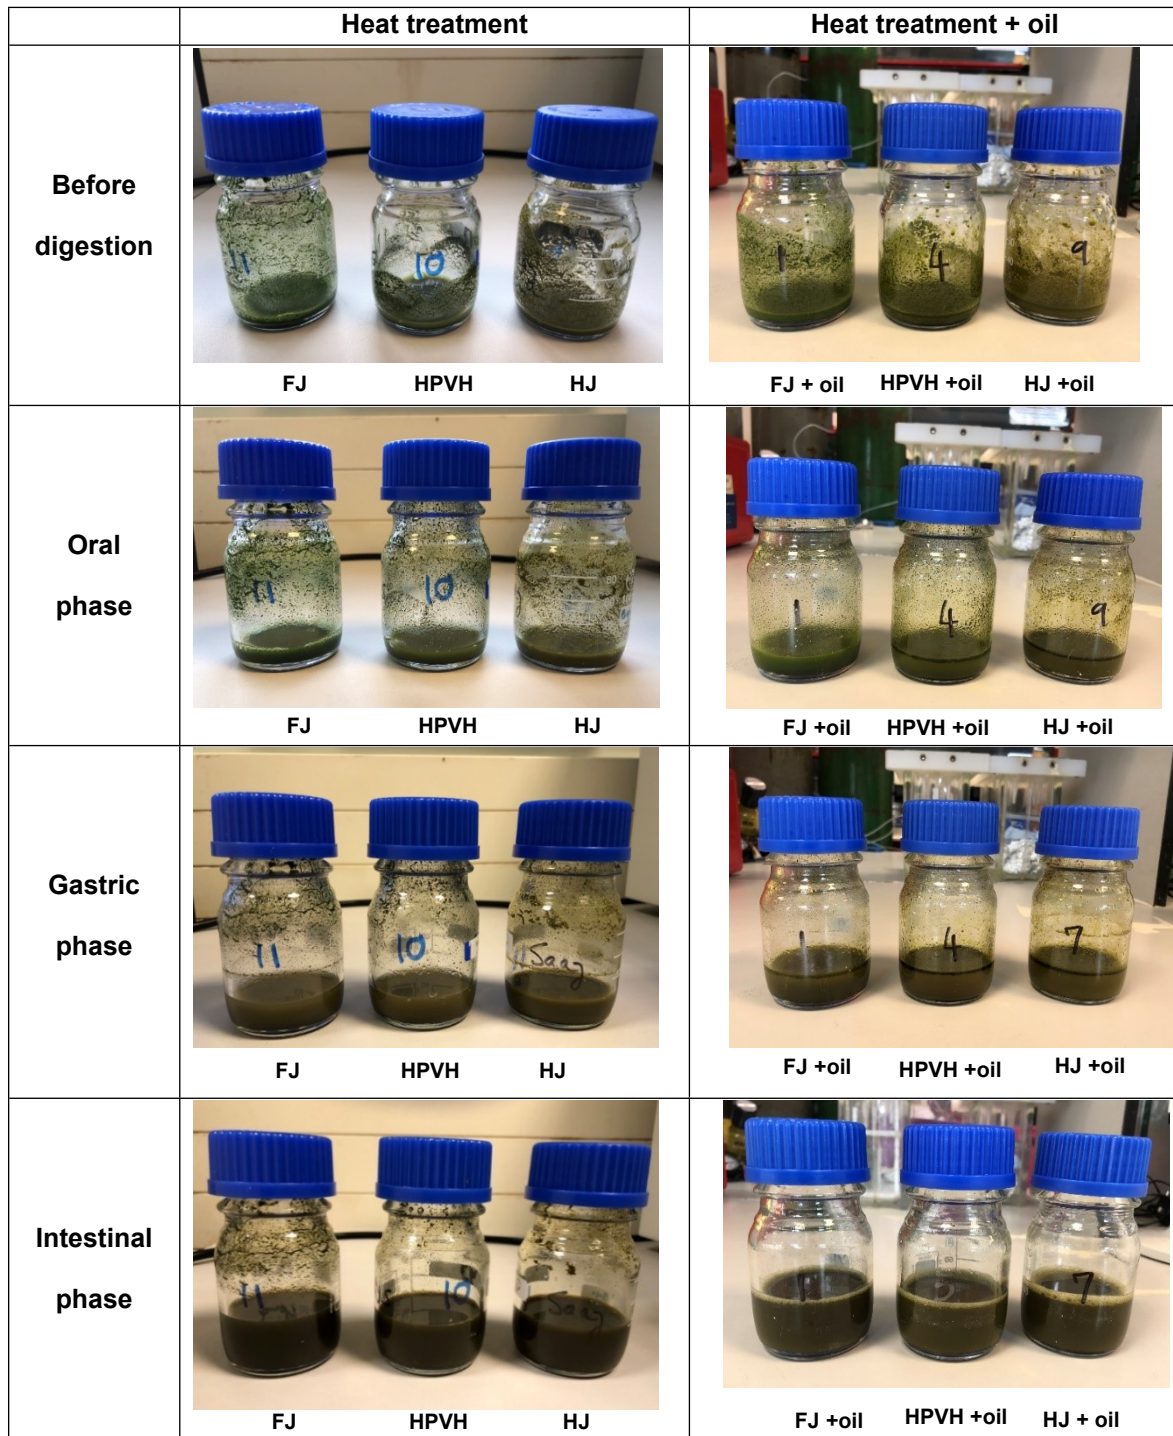

81

82 **Supplementary Figure 3:** Before and after digestion of CRF from PVH in each stage, including oral,  
 83 gastric and intestinal phases; FJ: fresh juice; HPVH: heated PVH; HJ: heated juice; oil: rapeseed oil.

84

85

86



87

88

89

90

91

92

93

94

95

96

97

98

99

100

101

102

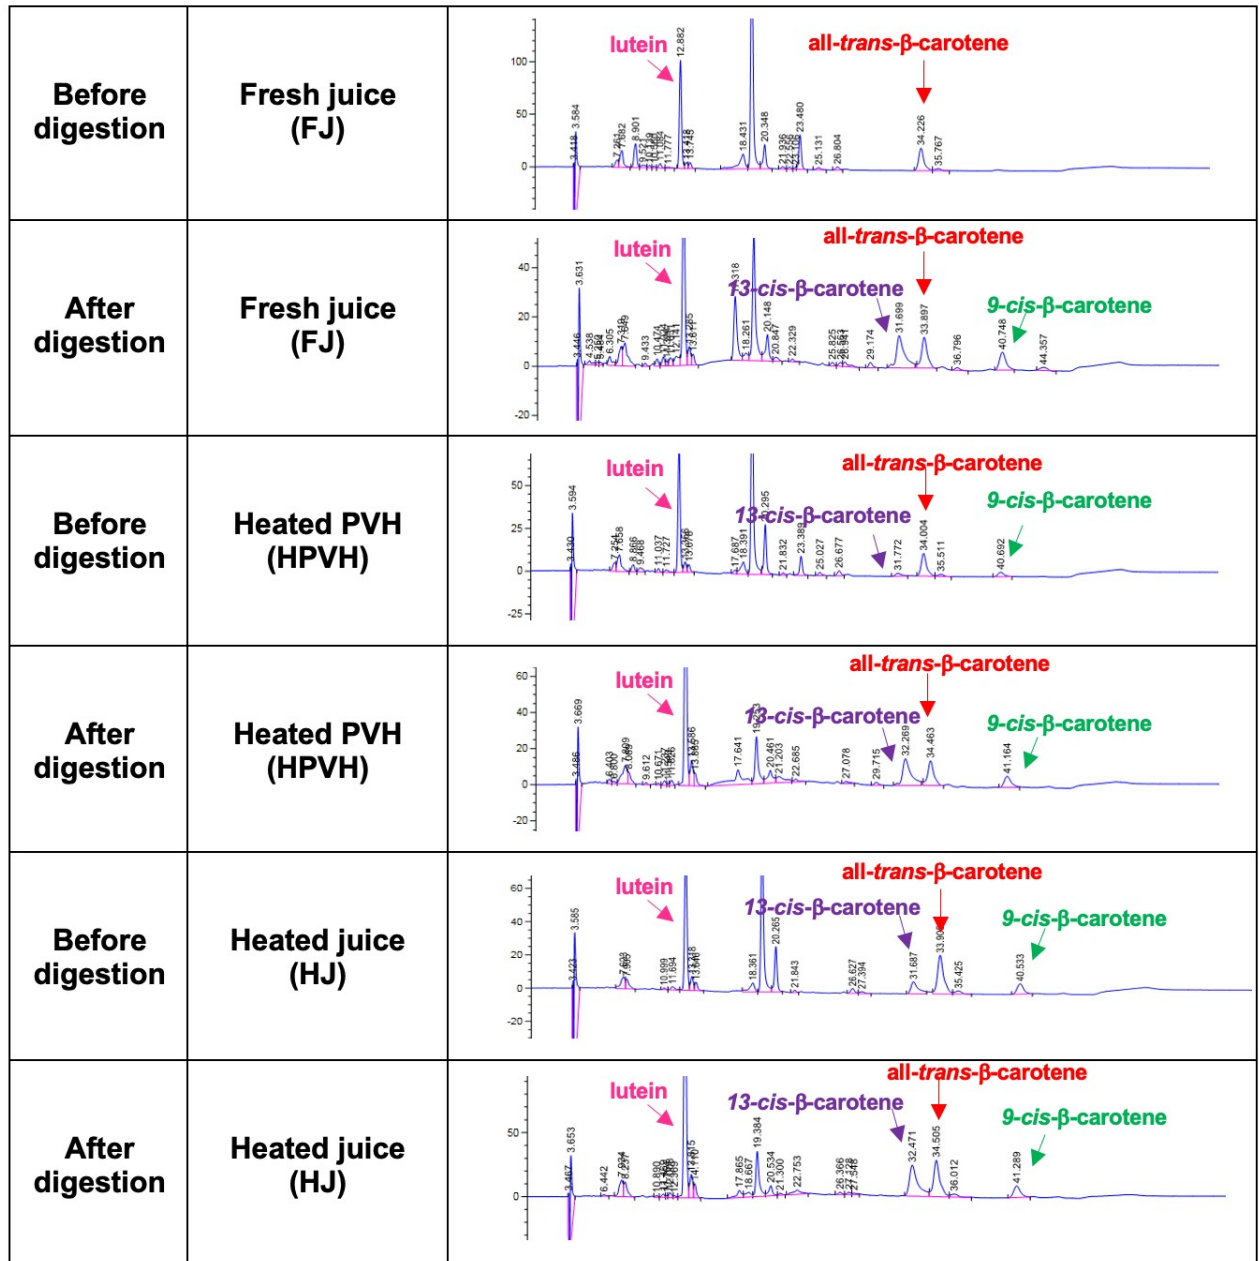103 **Supplementary Figure 4:** Chromatogram of  $\beta$ -carotene of CRF from PVH both before and after

104 digestion (the scale of chromatogram before and after digestion is not consistent and the size of the

105 peak should not be compared directly to each other due to a difference in dilution factor.

106

107

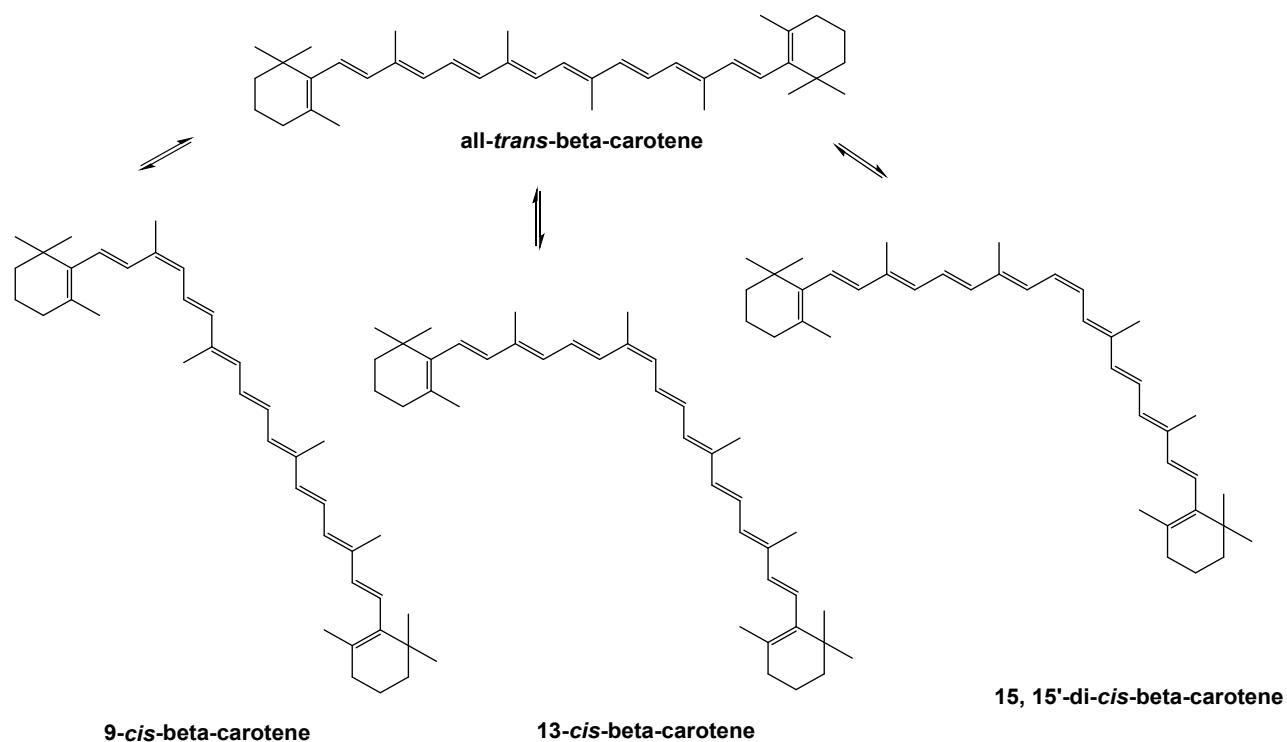

108  
109

110 **Supplementary Figure 5:** Chemical structures of isomerisation of  $\beta$ -carotene.

111
